# Supplementary material for: Differences in airway microbiome and metabolome of single lung transplant recipients
Source: Respir Res. 2020 May 6;21:104. doi: 10.1186/s12931-020-01367-3 (PMC7201609; doi:10.1186/s12931-020-01367-3)
Supplement: Supplementary file 6 — Additional file 6. [file 12931_2020_1367_MOESM6_ESM.xlsx]

## Sheet: Metabolome_x_Genus_native ST7
						Table ST5. Correlation of bacterial genus (X axis) with metabolite features in the native lungs (Y axis)
m/z	xName	Y1 ( Acenitobacter)	Y2 ( Acenitobacter)	Y3( Acenitobacter)	Y4( Acenitobacter)	Y5( Burkholderia)	Y6( Acenitobacter)	Y7 (Acinetobacter johnsonii)	Y10( Acenitobacter)	Y11 (Moraxellaceae	Y12 ( Acenitobacter)	Y13( Streptococcus)	Y14( Acenitobacter)	Y16( Veillonella)	Y18( Pseudomonas)	Y20( Pseudomonas)	Y21 ( Acenitobacter)	Y24(Moraxellaceae)	Y25(Sphingomonas)	Y26 (Streptococcus luteciae)	Y27 ( Pseudomonas)
184.133	X4	-0.9042	-0.8357	-0.8441	-0.9056	-0.8601	0	-0.9325	-0.8865	-0.9161	-0.9441	0	-0.933	0.8262	-0.9423	-0.9422	0	-0.8651	0.8231	0	-0.891
339.27	X5	0.943	0.8811	0.8647	0.9174	0.8883	0	0.9693	0.9073	0.9525	0.9736	0	0.9691	-0.8383	0.9655	0.9698	0	0.9032	-0.843	0	0.9249
332.278	X6	-0.8902	0	-0.8863	-0.9871	-0.8772	-0.8369	-0.9298	-0.9336	-0.9123	-0.9685	0	-0.9325	0.8958	-0.9885	-0.9729	0	-0.8481	0.8649	0	-0.8922
202.143	X8	-0.8343	0	0	-0.8724	0	0	-0.865	-0.8415	-0.8493	-0.8862	0	-0.8663	0	-0.8929	-0.8869	0	0	0	0	-0.8279
316.283	X11	-0.9136	-0.8208	-0.8917	-0.9822	-0.8905	0	-0.9505	-0.9385	-0.9329	-0.9814	0	-0.9525	0.8928	-0.9949	-0.9839	0	-0.8715	0.8701	0	-0.9108
311.293	X12	0	0	0.8373	0.9505	0	0.847	0.8539	0.8834	0.8372	0.9036	0	0.8576	-0.8603	0.9334	0.911	0	0	0	0	0.8214
330.259	X13	0	0	0	-0.922	0	-0.8947	0	-0.829	0	-0.8249	0	0	0.8304	-0.8726	-0.8376	0	0	0	0	0
514.348	X14	0	0	0	0.867	0	0.97	0	0	0	0	-0.8476	0	0	0	0	0	0	0	0	0
500.332	X15	0	0	0	0.8475	0	0.9737	0	0	0	0	-0.8587	0	0	0	0	0	0	0	-0.8277	0
314.268	X16	-0.9312	-0.8491	-0.8885	-0.9658	-0.8963	0	-0.9645	-0.9341	-0.9471	-0.9859	0	-0.9657	0.8795	-0.9915	-0.9861	0	-0.8897	0.8666	0	-0.9228
268.226	X17	-0.9215	-0.8373	-0.8839	-0.9638	-0.8896	0	-0.9554	-0.9295	-0.9381	-0.9789	0	-0.9568	0.8773	-0.9863	-0.9796	0	-0.8801	0.8622	0	-0.9144
198.149	X18	0	0	0	0	0	0.8844	0	0	0	0	0	0	0	0	0	0	0	0	0	0
298.273	X19	-0.9217	-0.8336	-0.8906	-0.9752	-0.8934	0	-0.957	-0.9369	-0.9395	-0.9837	0	-0.9587	0.8872	-0.9937	-0.9852	0	-0.8799	0.8688	0	-0.9164
375.248	X21	0	0	0	0.8371	0	0.9779	0	0	0	0	-0.8673	0	0	0	0	0	0	0	-0.8377	0
296.257	X22	-0.929	-0.8463	-0.8878	-0.9659	-0.895	0	-0.9625	-0.9335	-0.9451	-0.9845	0	-0.9638	0.8795	-0.9907	-0.9849	0	-0.8875	0.866	0	-0.921
376.27	X26	-0.8879	0	-0.8829	-0.9827	-0.8744	-0.8317	-0.9271	-0.93	-0.9097	-0.9652	0	-0.9298	0.8919	-0.9848	-0.9695	0	-0.8459	0.8616	0	-0.8896
311.169	X27	0	0	0.8306	0.9788	0	0.9525	0	0.8791	0	0.8739	0	0	-0.8815	0.9252	0.8876	0	0	0	0	0
200.131	X28	0	0	0	-0.8948	0	0	-0.8292	-0.8411	0	-0.8683	0	-0.832	0	-0.89	-0.8734	0	0	0	0	0
360.275	X29	-0.9289	-0.8487	-0.8835	-0.9586	-0.8926	0	-0.9615	-0.9288	-0.9443	-0.9815	0	-0.9627	0.8732	-0.9861	-0.9814	0	-0.8877	0.8618	0	-0.9198
187.099	X31	0	0	0	0	0	0.9356	0	0	0	0	-0.8595	0	0	0	0	0	0	0	-0.8413	0
186.115	X33	0	0	0	0.8984	0	0.9731	0	0	0	0	-0.8405	0	0	0	0	0	0	0	0	0
498.316	X37	0	0	0	0.8278	0	0.9717	0	0	0	0	-0.8631	0	0	0	0	0	0	0	-0.8342	0
287.201	X38	-0.8534	0	-0.848	-0.9435	-0.84	0	-0.891	-0.8932	-0.8742	-0.9273	0	-0.8935	0.8564	-0.9459	-0.9314	0	0	0.8275	0	-0.8548
484.301	X44	0	0	0	0	0	0.963	0	0	0	0	-0.8695	0	0	0	0	0	0	0	-0.8457	0
315.241	X47	-0.8309	-0.8295	0	0	0	0	-0.8356	0	-0.823	0	0	-0.8319	0	0	0	-0.8219	0	0	0	0
329.227	X48	-0.888	0	-0.8351	-0.8999	-0.848	0	-0.9172	-0.8774	-0.9009	-0.9315	0	-0.9179	0.8205	-0.9321	-0.9303	0	-0.8492	0	0	-0.8767
